# Supplementary material
Source: Research Square preprint supplement (doi:10.21203/rs.3.rs-9402754/v1)

**Supplementary Material**

**Supplementary Table S1. ICD-10 Codes Used to Define Comorbidities and Clinical Outcomes**

| Category | Condition | ICD-10 Codes |
| --- | --- | --- |
| Diabetes definition | Type 2 diabetes mellitus | E11.x–E14.x |
|  | Type 1 diabetes mellitus (exclusion) | E10.x |
| Cardiovascular outcomes | Atherosclerotic cardiovascular disease (ASCVD) | I20–I25, I63, I65–I66 |
|  | Heart failure | I50.x |
| Renal outcome | Chronic kidney disease (CKD) | N18.x |
|  | Kidney event* | N17.x, N18.x, N19 |
| Microvascular complications | Diabetic nephropathy | E11.2 |
|  | Diabetic retinopathy | E11.3, H36.0 |
|  | Diabetic neuropathy | E11.4 |
|  | Peripheral angiopathy/gangrene | E11.5, I70.2, I73.9 |
| Metabolic outcomes | Hypoglycaemia | E16.0–E16.2 |
|  | Diabetic ketoacidosis (DKA) | E11.1 |
| Infectious outcome | Urinary tract infection (UTI) | N39.0 |
| Hospitalisation outcome | Diabetes-related hospitalisation (HOS)** | Admission with primary diagnosis E11.x–E14.x |

*Kidney event defined as incident diagnosis of acute kidney injury or advanced CKD during follow-up.
**HOS was analysed regardless of prior history and therefore not restricted to incident events.

**Supplementary Table S2. Index Glucose-Lowering Medications and Concomitant Drug Definitions (NHIS Ingredient and ATC Codes)**

| Drug category | Drug / Class | NHIS ingredient codes |
| --- | --- | --- |
| Index drugs | Empagliflozin | 628201ATB, 628202ATB, 649000ATB, 649100ATB, 649200ATB, 649300ATB, 649400ATB, 649500ATB, 696900ATB, 697000ATB |
|  | Dapagliflozin | 527301ATB, 527302ATB, 639800ATR, 641400ATR, 693201ATB, 693202ATB, 693301ATB, 693302ATB, 693402ATB, 693501ATB, 693502ATB, 702400ATB, 706900ATB, 711300ATB, 712901ATB, 712902ATB, 715300ATR, 715400ATR, 715500ATR, 718300ATR, 718500ATR, 718600ATR, 718800ATR, 718900ATR, 719000ATR, 719100ATR, 719200ATR, 719300ATR, 719400ATR, 719700ATB, 720300ATB, 722200ATR, 722300ATR, 722400ATR, 722500ATR, 723000ATB, 723500ATB, 723900ATB, 724700ATB, 724800ATB, 726800ATR, 726900ATR |
|  | DPP-4 inhibitors | 624202ATB, 624203ATB, 630500ATB, 630600ATB, 635600ATB, 635700ATB, 675500ATB, 619101ATB, 632000ATR, 645000ATR, 654100ATR, 520500ATB, 520600ATB, 520700ATB, 616401ATB, 613301ATB, 613302ATB, 501101ATB, 501102ATB, 501103ATB, 694201ATB, 694202ATB, 694203ATB, 500801ATB, 685801ATB, 701201ATB |
| Baseline glucose-lowering covariates | Metformin | 191501ATB, 191502ATB, 191502ATR, 513700ATB, 513700ATR, 518500ATR, 519600ATB, 641800ATR, 672500ATR, 672700ATR, 702500ATB, 704200ATB, 705200ATB, 708400ATR, 709300ATR, 711100ATR, 718700ATR, 191505ATR, 641900ATR, 672600ATR, 672800ATR, 708300ATR, 711000ATR, 718200ATR, 191503ATB, 191503ATR, 498100ATB, 502900ATB, 507000ATB, 702600ATB, 704100ATB, 705300ATB, 191504ATB, 191504ATR, 502300ATB, 502300ATR, 507100ATB, 518600ATR, 524700ATR, 642000ATR, 683300ATR, 683400ATR, 702700ATB, 704300ATB, 705100ATB, 708200ATR, 709400ATR, 709500ATR, 710900ATR, 715200ATR |
|  | Insulin (all formulations) | 170131BIJ, 170130BIJ, 170431BIJ, 170430BIJ, 441331BIJ, 441330BIJ, 626700BIJ, 441333BIJ, 441332BIJ, 626830BIJ, 488730BIJ, 461831BIJ, 461830BIJ, 666700BIJ, 667000BIJ, 461832BIJ, 484930BIJ, 484931BIJ, 175331BIJ, 175330BIJ, 175333BIJ, 175332BIJ, 693900BIJ |
| Cardiovascular covariates | RAAS inhibitors (ACEi/ARB) | 104201ATB, 104202ATB, 662403ATB, 673500ATB, 673600ATB, 662402ATB, 122602ATB, 423700ATB, 662000ATB, 673700ATB, 122603ATB, 662100ATB, 122601ATB, 661800ATB, 661900ATB, 122901ATB, 122902ATB, 122903ATB, 133001ATB, 133002ATB, 133003ATB, 151601ATB, 151603ATB, 429201ATB, 460500ATB, 515202ATB, 526800ATB, 515203ATB, 654900ATB, 655000ATB, 515201ATB, 522000ATB, 654700ATB, 654800ATB, 716100ATB, 717500ATB, 177301ATB, 177303ATB, 184501ATB, 185703ATB, 185701ATB, 185702ATB, 468502ATB, 644100ATB, 644200ATB, 468501ATB, 526300ATB, 526400ATB, 526900ATB, 547700ATB, 632800ATB, 468503ATB, 526500ATB, 547600ATB, 632900ATB, 633000ATB, 653200ATB, 501602ATB, 501601ATB, 211301ATB, 211302ATB, 222404ATB, 222401ATB, 222402ATB, 651401ATB, 651402ATB, 651403ATB, 378803ATB, 378801ATB, 378802ATB, 644800ATB, 247102ATB, 247104ATB, 247103ATB, 247101ATB |
|  | Statins | 111501ATB, 524000ATB, 527100ATB, 614500ATB, 633800ATB, 671800ATR, 673800ATR, 688100ATB, 688200ATB, 694000ACS, 111502ATB, 524100ATB, 527000ATB, 633900ATB, 672000ATR, 688300ATB, 688400ATB, 111503ATB, 634800ATB, 719800ATB, 719900ATB, 711200ACS, 721300ATB, 111504ATB, 634600ATB, 502201ATB, 502202ATB, 502203ATB, 502204ATB, 162403ATR, 185801ATB, 470902ATB, 470901ATB, 634900ATB, 635000ATB, 470903ATB, 635100ATB, 635200ATB, 216601ATB, 216603ATB, 216604ATB, 216602ATB, 454001ATB, 454001ATD, 525000ATB, 525100ATB, 629900ATB, 630100ATB, 454005ATB, 454002ATB, 454002ATD, 525200ATB, 525300ATB, 630000ATB, 630200ATB, 454003ATB, 454003ATD, 629700ATB, 629800ATB, 631600ATB, 631700ATB, 227801ATB, 227801ATR, 227802ATB, 227806ATB |

Ingredient codes reflect NHIS active substance codes to ensure consistency across manufacturers and formulations.

Fixed-dose combination products were excluded unless the active ingredient corresponded to the target drug class.

**Supplementary Table 3A. Baseline Characteristics Before Propensity Score Matching: Dapagliflozin vs Empagliflozin**

| Characteristic | DAPA (n=29,434) | EMPA (n=17,050) | P value | SMD |
| --- | --- | --- | --- | --- |
| Demographics |  |  |  |  |
| Age, y | 39.39 (5.66) | 39.77 (5.62) | < 0.001 | 0.068 |
| Male sex | 20,630 (70.09) | 11,874 (69.64) | 0.311 | 0.010 |
| Income quintile (1=lowest) |  |  | 0.096 |  |
| └ 1 (lowest) | 4,556 (15.48) | 2,708 (15.88) |  | 0.011 |
| └ 2 | 4,604 (15.64) | 2,615 (15.34) |  | 0.008 |
| └ 3 | 6,625 (22.51) | 3,952 (23.18) |  | 0.016 |
| └ 4 | 8,226 (27.95) | 4,773 (27.99) |  | 0.001 |
| └ 5 (highest) | 5,423 (18.42) | 3,002 (17.61) |  | 0.021 |
| Clinical characteristics |  |  |  |  |
| Duration of diabetes, y | 2.11 (2.35) | 2.25 (2.53) | < 0.001 | 0.057 |
| Hypertension | 8,536 (29.00) | 4,943 (28.99) | 0.983 | 0.000 |
| Dyslipidemia | 19,667 (66.82) | 11,371 (66.69) | 0.782 | 0.003 |
| ASCVD | 1,077 (3.66) | 722 (4.23) | 0.002 | 0.030 |
| CKD | 160 (0.54) | 111 (0.65) | 0.143 | 0.014 |
| Chronic diabetic complications† | 3,235 (10.99) | 1,729 (10.14) | 0.004 | 0.028 |
| Hypoglycemia | 115 (0.39) | 20 (0.12) | < 0.001 | 0.054 |
| Diabetic ketoacidosis (DKA) | 133 (0.45) | 59 (0.35) | 0.087 | 0.017 |
| Urinary tract infection (UTI) | 744 (2.53) | 378 (2.22) | 0.035 | 0.020 |
| Health screening parameters |  |  |  |  |
| Fasting blood glucose, mg/dL | 137.03 (57.48) | 136.28 (57.56) | 0.174 | 0.013 |
| eGFR, mL/min/1.73m² | 101.03 (27.81) | 101.45 (28.49) | 0.117 | 0.015 |
| BMI, kg/m² | 29.45 (4.62) | 29.45 (4.65) | 0.892 | 0.001 |
| Medication use (baseline) |  |  |  |  |
| Metformin use | 20,335 (69.09) | 12,311 (72.21) | < 0.001 | 0.069 |
| Insulin use | 3,205 (10.89) | 2,001 (11.74) | 0.005 | 0.027 |
| RAAS inhibitor use (ACEi/ARB) | 5,752 (19.54) | 3,437 (20.16) | 0.108 | 0.015 |
| Statin use | 12,993 (44.14) | 7,570 (44.40) | 0.592 | 0.005 |
| Calendar period |  |  |  |  |
| Index year ≥2019 (post-KDA guideline update)‡ | 20,505 (69.66) | 13,305 (78.04) | < 0.001 | 0.191 |

**Supplementary Table 3B. Baseline characteristics before propensity score Matching: Empagliflozin vs DPP-4 Inhibitors**

| Characteristic | DPP4i (n=55,854) | EMPA (n=17,050) | P value | SMD | |
| --- | --- | --- | --- | --- | --- |
| Demographics |  |  |  |  | |
| Age, y | 39.86 (5.05) | 39.77 (5.62) | 0.058 | 0.017 | | | |
| Male sex | 41,309 (73.96) | 11,874 (69.64) | <0.001 | 0.095 | | | |
| Income quintile (1=lowest) |  |  | 0.024 |  | | | |
| └ 1 (lowest) | 9,401 (16.83) | 2,708 (15.88) |  | 0.026 | | | |
| └ 2 | 8,461 (15.15) | 2,615 (15.34) |  | 0.005 | | | |
| └ 3 | 12,510 (22.40) | 3,952 (23.18) |  | 0.018 | | | |
| └ 4 | 15,553 (27.85) | 4,773 (27.99) |  | 0.003 | |
| └ 5 (highest) | 9,929 (17.78) | 3,002 (17.61) |  | | 0.004 | |
| Clinical characteristics |  |  |  | |  | |
| Duration of diabetes, y | 2.12 (2.18) | 2.25 (2.53) | <0.001 | | 0.055 | |
| Hypertension | 13,549 (24.26) | 4,943 (28.99) | <0.001 | | 0.107 | |
| Dyslipidemia | 35,938 (64.34) | 11,371 (66.69) | <0.001 | | 0.050 | |
| ASCVD | 2,464 (4.41) | 722 (4.23) | 0.323 | | 0.009 | |
| CKD | 415 (0.74) | 111 (0.65) | 0.214 | | 0.011 | |
| Chronic diabetic complications† | 5,702 (10.21) | 1,729 (10.14) | 0.797 | | 0.002 | |
| Hypoglycemia | 81 (0.15) | 20 (0.12) | 0.394 | | 0.009 | |
| Diabetic ketoacidosis (DKA) | 286 (0.51) | 59 (0.35) | 0.006 | | 0.036 | |
| Urinary tract infection (UTI) | 1,427 (2.55) | 378 (2.22) | 0.013 | | 0.021 | |
| Health screening parameters |  |  |  | |  | |
| Fasting blood glucose, mg/dL | 145.52 (61.11) | 136.28 (57.56) | <0.001 | | 0.156 | |
| eGFR, mL/min/1.73m² | 99.37 (27.59) | 101.45 (28.49) | <0.001 | | 0.075 | |
| BMI, kg/m² | 27.60 (4.55) | 29.45 (4.65) | <0.001 | | 0.402 | |
| Medication use (baseline) |  |  |  | |  | |
| Metformin use | 34,462 (61.70) | 12,311 (72.21) | <0.001 | | 0.225 | |
| Insulin use | 5,587 (10.00) | 2,001 (11.74) | <0.001 | | 0.056 | |
| RAAS inhibitor use (ACEi/ARB) | 9,383 (16.80) | 3,437 (20.16) | <0.001 | | 0.087 | |
| Statin use | 23,979 (42.93) | 7,570 (44.40) | 0.001 | | 0.030 | |
| Calendar period |  |  |  |  | | |
| Index year ≥2019 (post-KDA guideline update)‡ | 28,690 (51.37) | 13,305 (78.04) | <0.001 | 0.593 | | |

Abbreviations: DAPA, dapagliflozin; DPP4i, dipeptidyl peptidase-4 inhibitor; EMPA, empagliflozin; ASCVD, atherosclerotic cardiovascular disease; CKD, chronic kidney disease; DKA, diabetic ketoacidosis; UTI, urinary tract infection; RAAS, renin–angiotensin–aldosterone system; ACEi, angiotensin-converting enzyme inhibitor; ARB, angiotensin receptor blocker; BMI, body mass index; eGFR, estimated glomerular filtration rate; SMD, standardized mean difference. Values are presented as mean (SD) or n (%).
Standardized mean differences (SMDs) were calculated to assess covariate balance after propensity score matching. An SMD <0.10 was considered indicative of adequate balance.

Chronic diabetic complications included diabetic nephropathy, retinopathy, neuropathy, and peripheral vascular disease/gangrene, which were identified using the ICD-10 codes during the baseline period.
 The calendar period variable was defined to account for the 2019 revision of the Korean Diabetes Association (KDA) clinical practice guidelines, which strengthened the recommendations for SGLT2 inhibitors in patients with established ASCVD, heart failure, or chronic kidney disease. This variable was included to mitigate potential calendar-time bias arising from shifts in prescription patterns.

**Figure S1A. Distribution of propensity scores before and after matching for the empagliflozin versus dapagliflozin comparison**
This figure shows the distribution of propensity scores for patients treated with empagliflozin (EMPA) and dapagliflozin (DAPA) before and after 1:1 propensity score matching. Propensity scores were estimated using logistic regression models based on baseline covariates and the matching procedure was performed using SAS software. The upper panel illustrates the propensity score distribution before matching, and the lower panel shows the distribution after matching. Density histograms and smoothed curves are presented for each treatment group to assess the overlap in propensity score distributions. Improved overlap of the distributions after matching indicates adequate balance of baseline characteristics between the treatment groups.


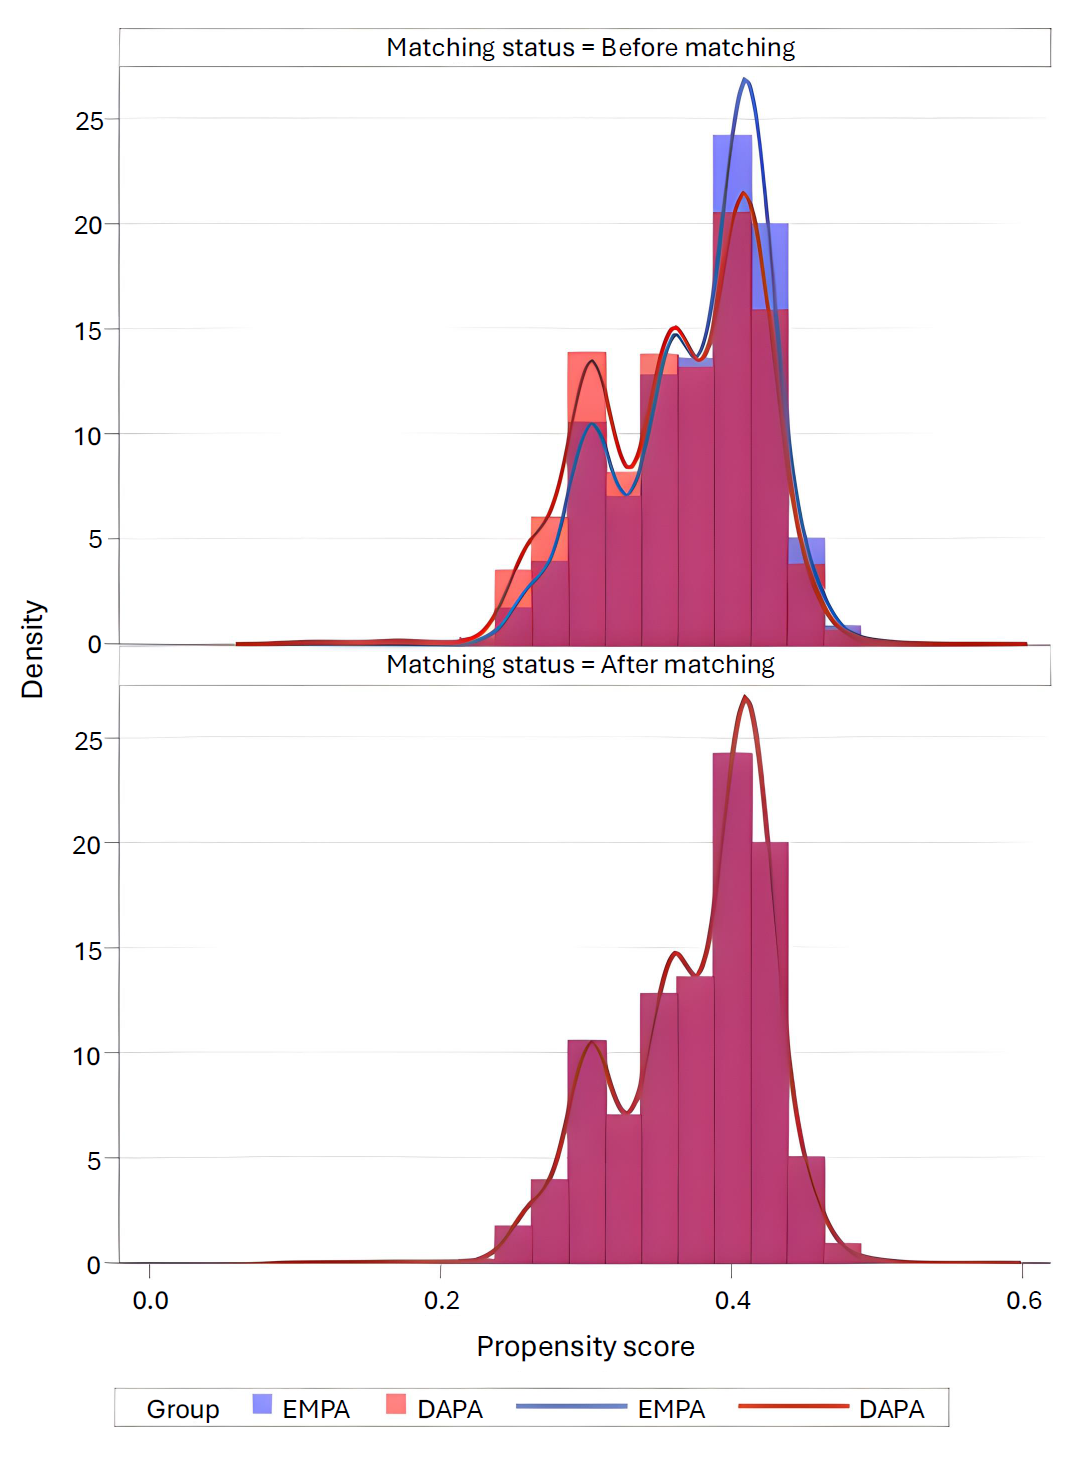


**Figure S1B. Distribution of propensity scores before and after matching for the empagliflozin versus DPP-4 inhibitor comparison**
This figure shows the distribution of propensity scores for patients treated with empagliflozin (EMPA) and dipeptidyl peptidase-4 inhibitors (DPP-4i) before and after 1:1 propensity score matching. Propensity scores were estimated using logistic regression models based on baseline covariates, and matching was performed using SAS software. The upper panel illustrates the propensity score distribution before matching, and the lower panel shows the distribution after matching. Density histograms and smoothed curves are presented for each treatment group to evaluate the overlap of propensity score distributions. Improved overlap after matching indicates adequate balance of baseline characteristics between the treatment groups.


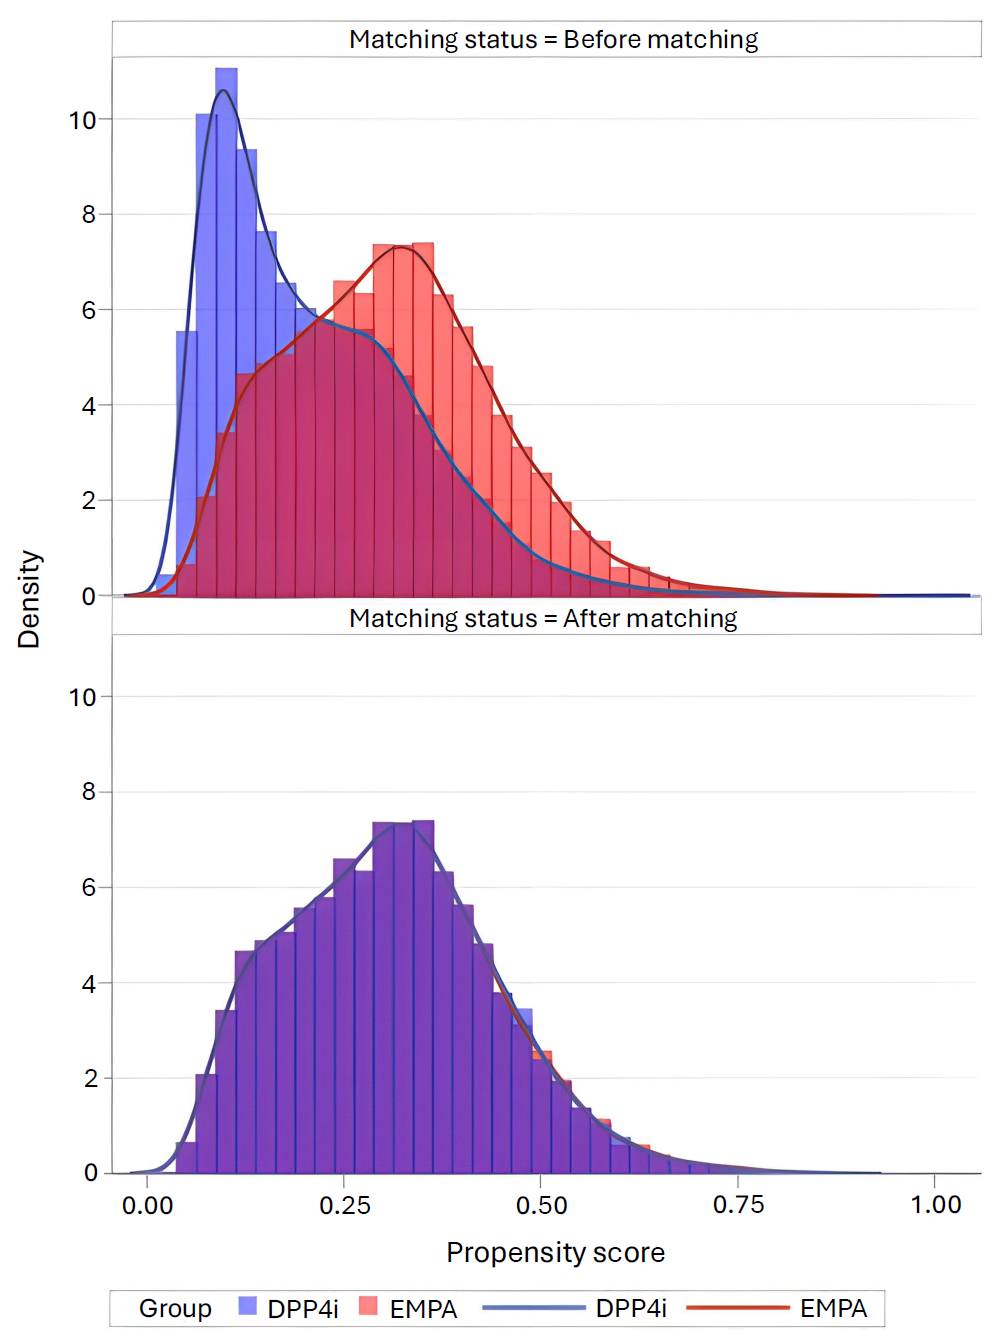

Supplement: Supplementary file 1 [file c0912e3800c6f76d2ba8be42.docx]
